# Supplementary material
Source: PubMed Central journal article supplement (PMC5502210)
Supplement: NIHMS875531-supplement-supplement_1.pdf [file NIHMS875531-supplement-supplement_1.pdf]

## SUPPLEMENTARY FIGURES

**Supplementary Figure 1:** Baseline mannitol excretion. (A)  $^{12}\text{C}$  mannitol vs  $^{13}\text{C}$  mannitol in healthy volunteers (B) Corresponding values for IBS-C patients.

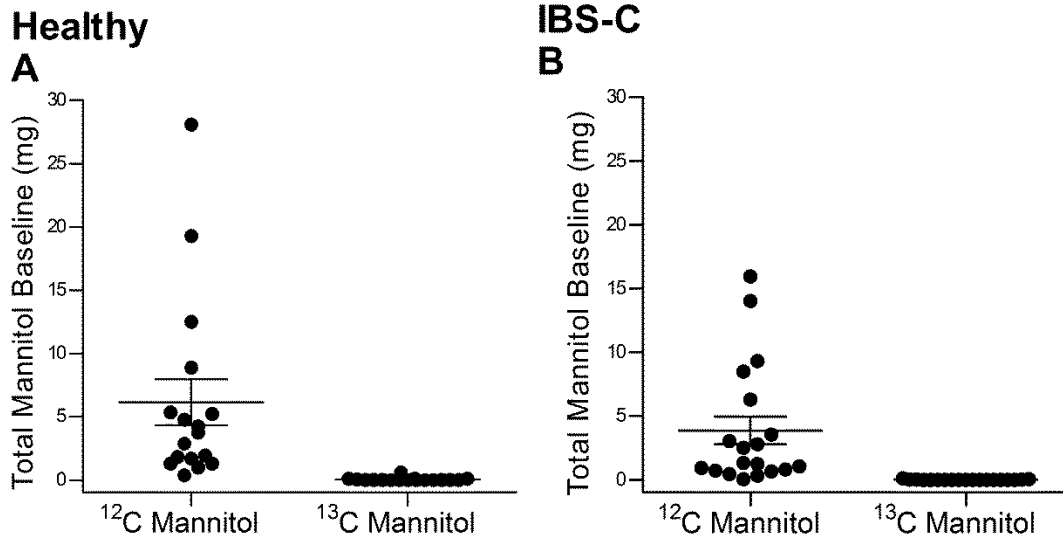

**Supplementary Figure 2:** *In vivo* permeability assessment using saccharide excretion assay.

Panels (A-C) reflect 2-8 hours post-test saccharide administration and (D-F) reflect overall 0-24 hours post-test saccharide administration. (A) Cumulative lactulose excretion. (B) Cumulative  $^{13}\text{C}$  mannitol excretion. (C) Lactulose/ $^{13}\text{C}$  mannitol ratio expressed as percentage of administered dose for each volunteer. Panels D-F are corresponding cumulative excretion values and Lactulose/ $^{13}\text{C}$  mannitol ratio for 0-24 hour interval. Data are presented as mean  $\pm$  SEM. HV n=18, IBS-C n=19.

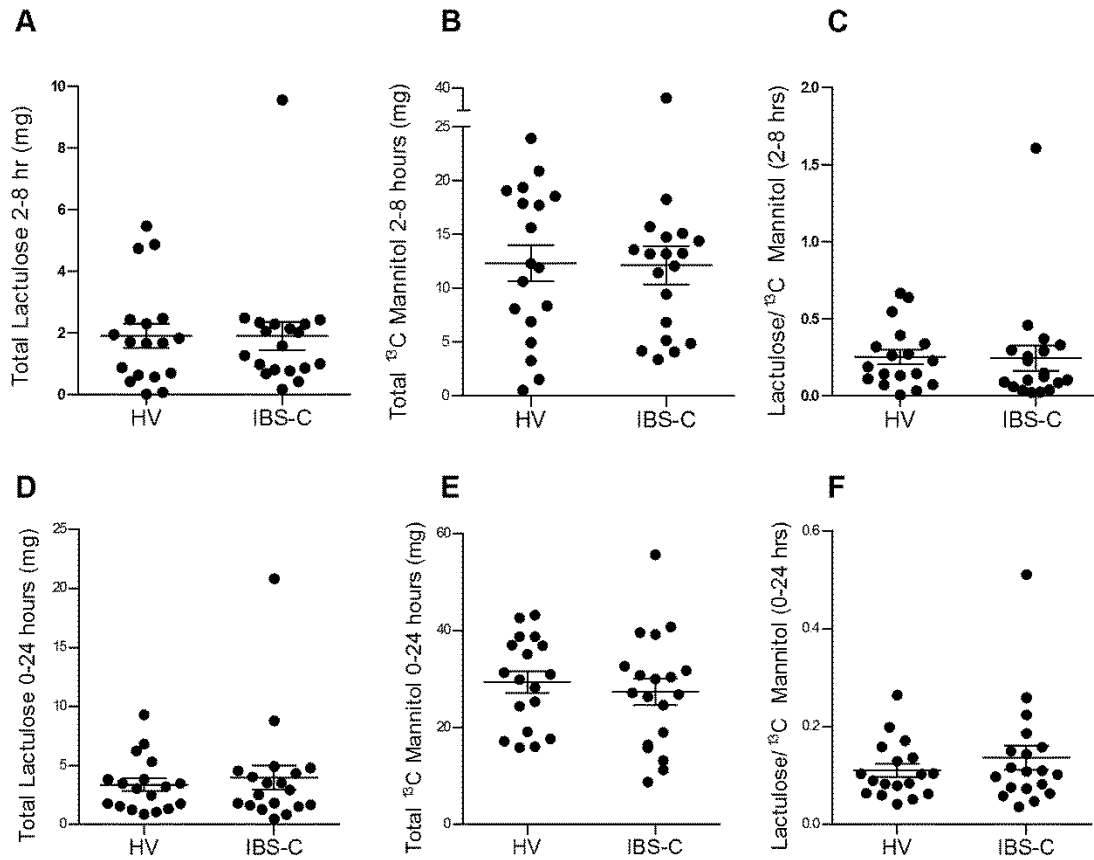

**Supplementary Table 1. Human tight junction gene expression in colonic mucosa of IBS-C patients compared to healthy controls**

| Gene Name                                                                                      | Gene Symbol | Fold Change | p-value  | 95% Confidence interval |
|------------------------------------------------------------------------------------------------|-------------|-------------|----------|-------------------------|
| Glyceraldehyde-3-phosphate dehydrogenase                                                       | GAPDH       | 1           | 0        | (1.00, 1.00)            |
| Claudin 3                                                                                      | CLDN3       | 1.3733      | 0.003087 | (1.13, 1.62)            |
| Symplekin                                                                                      | SYMPK       | 1.3535      | 0.005514 | (1.06, 1.65 )           |
| Catenin (cadherin-associated protein), beta 1                                                  | CTNNB1      | 1.3325      | 0.014354 | (1.03, 1.64)            |
| MAP/microtubule affinity-regulating kinase 2                                                   | MARK2       | 1.2039      | 0.020875 | (1.03, 1.38)            |
| Lethal giant larvae homolog 1 (Drosophila)                                                     | LLGL1       | 1.2506      | 0.021913 | (1.02, 1.48)            |
| Lethal giant larvae homolog 2 (Drosophila)                                                     | LLGL2       | 1.2185      | 0.031746 | (1.02, 1.42)            |
| Rho/rac guanine nucleotide exchange factor (GEF) 2                                             | ARHGEF2     | 1.3149      | 0.046102 | (1.03, 1.60)            |
| Ras homolog gene family, member A                                                              | RHOA        | 0.8357      | 0.062047 | (0.70, 0.97)            |
| Claudin 5                                                                                      | CLDN5       | 1.2588      | 0.065328 | (0.98, 1.53)            |
| Cortactin                                                                                      | CTTN        | 1.1974      | 0.089768 | (0.96, 1.44)            |
| Tight junction associated protein 1 (peripheral)                                               | TJAP1       | 1.1619      | 0.09773  | (0.95, 1.37)            |
| Protein kinase C, zeta                                                                         | PRKCZ       | 1.1509      | 0.114528 | (0.95, 1.35)            |
| Phosphatase and tensin homolog                                                                 | PTEN        | 0.8663      | 0.122533 | (0.74, 0.99)            |
| Tight junction protein 2 (zona occludens 2)                                                    | TJP2        | 1.1603      | 0.125545 | (0.95, 1.37)            |
| F11 receptor                                                                                   | F11R        | 1.125       | 0.150743 | (0.97, 1.28)            |
| Integrin-linked kinase                                                                         | ILK         | 1.1128      | 0.152386 | (0.97, 1.26)            |
| T-cell lymphoma invasion and metastasis 1                                                      | TIAM1       | 1.2484      | 0.153465 | (0.91, 1.59)            |
| Cyclin-dependent kinase 4                                                                      | CDK4        | 1.146       | 0.157422 | (0.95, 1.35)            |
| Claudin 1                                                                                      | CLDN1       | 0.7094      | 0.169881 | (0.47, 0.95)            |
| Ras-related C3 botulinum toxin substrate 1 (rho family, small GTP binding protein Rac1)        | RAC1        | 0.8873      | 0.223786 | (0.75, 1.02)            |
| Claudin 15                                                                                     | CLDN15      | 1.2052      | 0.223905 | (0.86, 1.55)            |
| Catenin (cadherin-associated protein), alpha 3                                                 | CTNNA3      | 0.8696      | 0.244078 | (0.46, 1.28)            |
| Claudin 7                                                                                      | CLDN7       | 1.1127      | 0.267872 | (0.88, 1.34)            |
| Immunoglobulin superfamily, member 5                                                           | IGSF5       | 0.8184      | 0.278348 | (0.54, 1.10)            |
| Cingulin                                                                                       | CGN         | 1.1086      | 0.33568  | (0.88, 1.34)            |
| Spectrin, alpha, non-erythrocytic 1 (alpha-fodrin)                                             | SPTAN1      | 1.0643      | 0.341253 | (0.93, 1.20)            |
| Claudin 2                                                                                      | CLDN2       | 0.8203      | 0.349738 | (0.46, 1.18)            |
| Crumbs homolog 3 (Drosophila)                                                                  | CRB3        | 1.0884      | 0.354688 | (0.90, 1.27)            |
| Angiomotin like 1                                                                              | AMOTL1      | 1.1195      | 0.356595 | (0.87, 1.37)            |
| Myeloid/lymphoid or mixed-lineage leukemia (trithorax homolog, Drosophila); translocated to, 4 | MLLT4       | 1.1944      | 0.364314 | (0.82, 1.57)            |
| Tight junction protein 1 (zona occludens 1)                                                    | TJP1        | 0.8556      | 0.374929 | (0.64, 1.07)            |
| Hypoxanthine phosphoribosyltransferase 1                                                       | HPRT1       | 0.912       | 0.381571 | (0.75, 1.07)            |
| Membrane protein, palmitoylated 6 (MAGUK p55 subfamily member 6)                               | MPP6        | 0.936       | 0.386957 | (0.40, 1.47)            |
| VAMP (vesicle-associated membrane protein)-associated protein A, 33kDa                         | VAPA        | 0.8758      | 0.388812 | (0.69, 1.06)            |
| CD99 molecule                                                                                  | CD99        | 0.9402      | 0.390355 | (0.80, 1.08)            |

|                                                                                         |         |        |          |                  |
|-----------------------------------------------------------------------------------------|---------|--------|----------|------------------|
| Membrane associated guanylate kinase, WW and PDZ domain containing 1                    | MAGI1   | 1.0797 | 0.419367 | (0.89, 1.27)     |
| Calcium/calmodulin-dependent serine protein kinase (MAGUK family)                       | CASK    | 1.0488 | 0.446084 | (0.92, 1.17)     |
| Crumbs homolog 1 (Drosophila)                                                           | CRB1    | 0.781  | 0.455534 | (0.49, 1.07)     |
| Protein kinase C, iota                                                                  | PRKCI   | 1.0606 | 0.462337 | (0.89, 1.23)     |
| Junctional adhesion molecule 2                                                          | JAM2    | 0.9113 | 0.479692 | (0.68, 1.14)     |
| Claudin 17                                                                              | CLDN17  | 0.8086 | 0.479909 | (0.48, 1.14)     |
| Actinin, alpha 4                                                                        | ACTN4   | 0.6686 | 0.488735 | (0.00001, 1.39)  |
| Par-6 partitioning defective 6 homolog beta (C. elegans)                                | PAR6B   | 0.9145 | 0.500649 | (0.65, 1.18)     |
| Casein kinase 2, alpha 1 polypeptide                                                    | CSNK2A1 | 2.0198 | 0.501709 | (0.00001, 4.99)  |
| Claudin 9                                                                               | CLDN9   | 1.2135 | 0.523375 | (0.78, 1.65)     |
| Claudin 6                                                                               | CLDN6   | 1.0752 | 0.560416 | (0.59, 1.56)     |
| Ash1 (Absent, Small, or Homeotic)-like (Drosophila)                                     | ASH1L   | 1.0553 | 0.566243 | (0.87, 1.24)     |
| Claudin 11                                                                              | CLDN11  | 1.0619 | 0.59513  | (0.65, 1.47)     |
| Occludin                                                                                | OCLN    | 0.924  | 0.636917 | (0.76, 1.09)     |
| Ribosomal protein, large, P0                                                            | RPLP0   | 1.0493 | 0.643085 | (0.84, 1.26)     |
| Claudin 18                                                                              | CLDN18  | 1.1697 | 0.654061 | (0.69, 1.65)     |
| Actinin, alpha 2                                                                        | ACTN2   | 0.8465 | 0.660237 | (0.53, 1.16)     |
| Claudin 14                                                                              | CLDN14  | 0.8456 | 0.666315 | (0.54, 1.15)     |
| InaD-like (Drosophila)                                                                  | INADL   | 0.7529 | 0.667988 | (0.13, 1.37)     |
| Claudin 12                                                                              | CLDN12  | 0.9517 | 0.675643 | (0.75, 1.16)     |
| Sterile alpha motif and leucine zipper containing kinase AZK                            | ZAK     | 1.0737 | 0.685611 | (0.68, 1.47)     |
| Spectrin, alpha, erythrocytic 1 (elliptocytosis 2)                                      | SPTA1   | 0.8574 | 0.691454 | (0.55, 1.16)     |
| Casein kinase 2, alpha prime polypeptide                                                | CSNK2A2 | 1.0252 | 0.698409 | (0.87, 1.18)     |
| Claudin 16                                                                              | CLDN16  | 0.8602 | 0.710186 | (0.55, 1.17)     |
| Par-3 partitioning defective 3 homolog (C. elegans)                                     | PAR3    | 1.0201 | 0.712725 | (0.87, 1.17)     |
| Catenin (cadherin-associated protein), alpha 2                                          | CTNNA2  | 0.9643 | 0.727251 | (0.59, 1.34)     |
| Claudin 4                                                                               | CLDN4   | 0.9503 | 0.742827 | (0.72, 1.18)     |
| Cold shock domain protein A                                                             | YBX3    | 1.0203 | 0.749401 | (0.87, 1.17)     |
| Actinin, alpha 3                                                                        | ACTN3   | 0.8911 | 0.769684 | (0.58, 1.20)     |
| Multiple PDZ domain protein                                                             | MPDZ    | 1.068  | 0.771069 | (0.76, 1.38)     |
| Junctional adhesion molecule 3                                                          | JAM3    | 1.0234 | 0.775487 | (0.80, 1.24)     |
| Tight junction protein 3 (zona occludens 3)                                             | TJP3    | 0.9779 | 0.777915 | (0.71, 1.24)     |
| SMAD specific E3 ubiquitin protein ligase 1                                             | SMURF1  | 1.0236 | 0.779616 | (0.87, 1.18)     |
| Actinin, alpha 1                                                                        | ACTN1   | 1.0326 | 0.81302  | (0.84, 1.22)     |
| Actin, beta                                                                             | ACTB    | 0.9735 | 0.82783  | (0.81, 1.14)     |
| Beta-2-microglobulin                                                                    | B2M     | 3.0683 | 0.830729 | (0.00001, 10.33) |
| Platelet/endothelial cell adhesion molecule                                             | PECAM1  | 1.3879 | 0.854852 | (0.27, 2.50)     |
| Guanine nucleotide binding protein (G protein), alpha inhibiting activity polypeptide 1 | GNAI1   | 0.9765 | 0.860181 | (0.78, 1.17)     |
| Cell division cycle 42 (GTP binding protein, 25kDa)                                     | CDC42   | 1.065  | 0.872952 | (0.64, 1.49)     |
| Erythrocyte membrane protein band 4.1 (elliptocytosis 1, RH-linked)                     | EPB41   | 0.98   | 0.8753   | (0.80, 1.16)     |
| Intercellular adhesion molecule 2                                                       | ICAM2   | 1.0491 | 0.885135 | (0.68, 1.42)     |

|                                                                      |        |        |          |              |
|----------------------------------------------------------------------|--------|--------|----------|--------------|
| Membrane associated guanylate kinase, WW and PDZ domain containing 2 | MAGI2  | 0.9355 | 0.885355 | (0.62, 1.25) |
| Intercellular adhesion molecule 1                                    | ICAM1  | 0.8027 | 0.886545 | (0.28, 1.33) |
| Claudin 8                                                            | CLDN8  | 0.9378 | 0.892385 | (0.63, 1.24) |
| Casein kinase 2, beta polypeptide                                    | CSNK2B | 0.9859 | 0.905917 | (0.84, 1.13) |
| Catenin (cadherin-associated protein), alpha 1                       | CTNNA1 | 0.9877 | 0.925351 | (0.82, 1.16) |
| Claudin 19                                                           | CLDN19 | 0.9898 | 0.932433 | (0.66, 1.32) |
| Spectrin, beta, erythrocytic                                         | SPTB   | 0.9962 | 0.934065 | (0.85, 1.15) |
| Claudin 10                                                           | CLDN10 | 0.9277 | 0.941097 | (0.59, 1.26) |
| Endothelial cell adhesion molecule                                   | ESAM   | 1.0263 | 0.954875 | (0.76, 1.29) |
| Par-6 partitioning defective 6 homolog alpha ( <i>C. elegans</i> )   | PARD6A | 0.8829 | 0.971967 | (0.44, 1.32) |
| Hematopoietic cell-specific Lyn substrate 1                          | HCLS1  | 0.7904 | 0.972109 | (0.25, 1.33) |
| Membrane protein, palmitoylated 5 (MAGUK p55 subfamily member 5)     | MPP5   | 0.9934 | 0.993602 | (0.83, 1.15) |
